# Supplementary material for: Effect of monomer structure on the gelation of a class of metallo-supramolecular polymers
Source: Royal Society of Chemistry journal article supplement (doi:10.1039/b911166b), 2009-01-01
Supplement: b911166b.pdf [file b911166b.pdf]

## **Effect of Monomer Structure on the Gelation of a Class of Metallo-Supramolecular Polymers**

Wengui Weng, Zheng Li, Alex. M. Jamieson\* and S. J. Rowan\*

*Department of Macromolecular Science & Engineering, Case Western Reserve University,*

*2100 Adelbert Road, Cleveland, Ohio 44106-7202.*

|                                                                                |   |
|--------------------------------------------------------------------------------|---|
| Differential scanning calorimetry (DSC) analysis of the ligand monomers.       | 2 |
| SAXS patterns of gels formed in 60/40 DMSO/ethylene glycol 1.                  | 4 |
| Plots of gel formation from clear sols for transparent <b>2:Zn</b> gel samples | 5 |

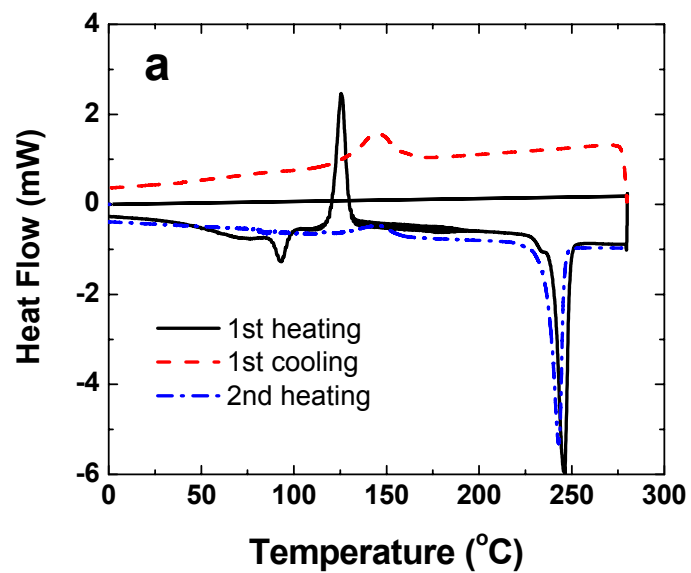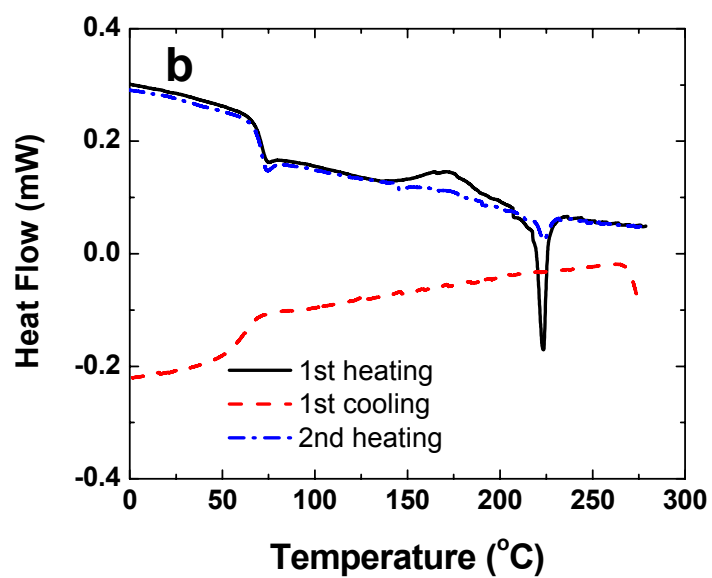

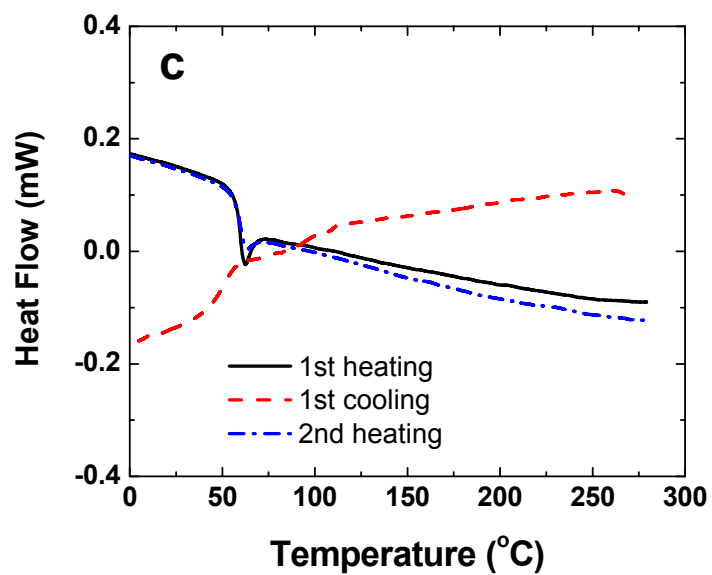

**Figure 1.** Differential scanning calorimetry (DSC) analysis of the ligand monomers (a) **1**, (b) **2**, (c) **3**. Heating and cooling rates are 10 °C/min, nitrogen atmosphere.

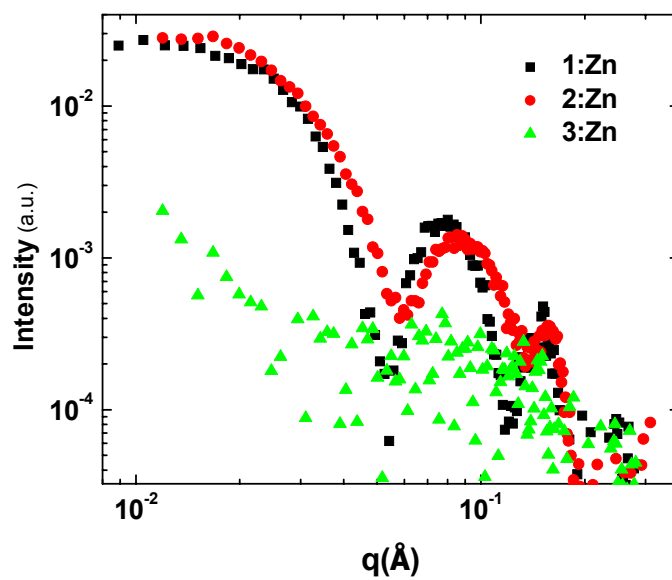

**Figure 2.** SAXS patterns from transparent gels formed by **1:Zn**, **2:Zn**, and **3:Zn** in 60:40 (vol/vol) DMSO/ethylene glycol at a concentration of 50 mg/ml.

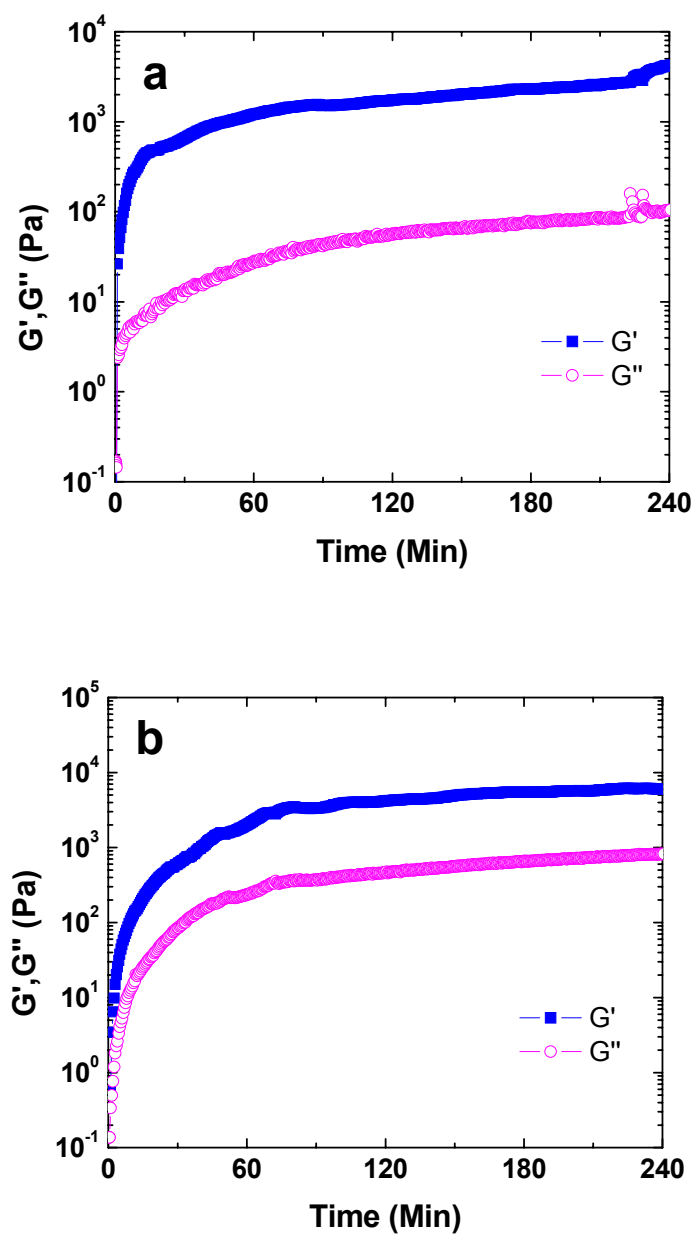

**Figure 3.** Plots of gel formation from clear sols for transparent  $2:Zn$  gel samples formed in (a) in 80/20 (vol/vol) DMSO/water and (b) in a 60/40 (vol/vol) DMSO/ethylene glycol mixtures at a concentration of 40 mg/mL and 50 mg/mL, respectively.
